# Supplementary material
Source: PubMed Central journal article supplement (PMC2850621)

**Supplementary Table 1.** Distribution of plasma sOB-R levels and other characteristics among the study population

| Characteristics                        | N     | Value <sup>a</sup> |
|----------------------------------------|-------|--------------------|
| Age (yr)                               | 1,504 | 56.2 (6.9)         |
| BMI (kg/m <sup>2</sup> )               | 1,504 | 28.0 (5.6)         |
| WHR                                    | 1,022 | 0.80 (0.07)        |
| Physical activity (MET-hr/week)        | 1,487 | 15.8 (17.8)        |
| Alcohol (g/day)                        | 1,488 | 5.4 (8.7)          |
| Smoking status (%)                     | 1,504 |                    |
| Never smoked                           |       | 719 (47.8)         |
| Past smoker                            |       | 618 (41.9)         |
| Current smoker                         |       | 167 (11.1)         |
| Menopausal status (%) <sup>b</sup>     | 1,504 |                    |
| Pre-menopause                          |       | 335 (22.3)         |
| Post-menopause, never used hormone     |       | 467 (31.5)         |
| Post-menopause, hormone past user      |       | 196 (13.0)         |
| Post-menopause, hormone current user   |       | 506 (33.6)         |
| Family history of diabetes (%)         | 1,504 | 477 (31.7)         |
| Type 2 diabetes (%)                    | 1,504 | 684 (45.5)         |
| Fasting status (%)                     | 1,504 | 968 (64.4)         |
| Total energy (kcal/day)                | 1,488 | 1800 (518)         |
| Glycemic load                          | 1,488 | 96.1 (15.8)        |
| Cereal fiber (g/day)                   | 1,488 | 4.0 (1.7)          |
| Polyunsaturated to saturated fat ratio | 1,488 | 0.51 (0.13)        |
| Trans fat (g/day)                      | 1,488 | 1.9 (0.5)          |
| sOB-R (ng/mL)                          | 1,504 | 31.4 (10.5)        |
| Leptin (ng/mL)                         | 1,504 | 25.0 (14.3)        |

<sup>a</sup>Mean (SD) for continuous variables; n (%) for categorical variables. <sup>b</sup>Hormone refers to hormone replacement therapy.

**Supplementary Table 2.** Top genotyped and imputed SNPs ( $P < 5 \times 10^{-8}$ ) for plasma sOB-R<sup>a</sup>

| SNP        | Position (bp) <sup>b</sup> | Gene | Gene region | Alleles (+/-) | MAF <sup>c</sup> | r <sup>2</sup> | Beta <sup>d</sup> | s.e.  | P <sup>d</sup> |
|------------|----------------------------|------|-------------|---------------|------------------|----------------|-------------------|-------|----------------|
| rs2767485  | 65751505                   | LEPR | Intron      | T/C           | 0.17             | 0.9986         | 0.098             | 0.012 | 5.77E-15       |
| rs12079231 | 65743743                   | LEPR | Intron      | C/G           | 0.17             | 0.9999         | 0.097             | 0.012 | 6.88E-15       |
| rs11208656 | 65743375                   | LEPR | Intron      | A/G           | 0.17             | 1              | 0.097             | 0.012 | 7.11E-15       |
| rs12062820 | 65743083                   | LEPR | Intron      | T/C           | 0.17             | 1              | 0.097             | 0.012 | 7.11E-15       |
| rs1782755  | 65759392                   | LEPR | Intron      | C/A           | 0.17             | 1              | 0.097             | 0.012 | 8.66E-15       |
| rs1627238  | 65758667                   | LEPR | Intron      | G/A           | 0.17             | 0.9999         | 0.096             | 0.012 | 8.88E-15       |
| rs1171275  | 65755221                   | LEPR | Intron      | C/T           | 0.17             | 0.9995         | 0.096             | 0.012 | 1.13E-14       |
| rs1180445  | 65755507                   | LEPR | Intron      | T/C           | 0.17             | 0.9995         | 0.096             | 0.012 | 1.13E-14       |
| rs1171278  | 65760734                   | LEPR | Intron      | C/T           | 0.17             | 0.9786         | 0.096             | 0.012 | 2.42E-14       |
| rs1171276  | 65760037                   | LEPR | Intron      | A/G           | 0.19             | 0.9348         | 0.095             | 0.012 | 5.43E-14       |
| rs1751492  | 65765213                   | LEPR | Intron      | T/C           | 0.30             | 1              | -0.076            | 0.010 | 4.00E-13       |
| rs1186403  | 65773121                   | LEPR | Intron      | T/C           | 0.30             | 1              | -0.076            | 0.010 | 4.40E-13       |
| rs2154381  | 65768289                   | LEPR | Intron      | A/G           | 0.30             | 1              | -0.076            | 0.010 | 4.61E-13       |
| rs1171266  | 65776412                   | LEPR | Intron      | C/T           | 0.30             | 0.9925         | -0.075            | 0.010 | 1.35E-12       |
| rs1171274  | 65753426                   | LEPR | Intron      | T/C           | 0.27             | 0.9984         | -0.076            | 0.011 | 3.62E-12       |
| rs7516840  | 65745183                   | LEPR | Intron      | G/C           | 0.27             | 0.9992         | -0.076            | 0.011 | 3.68E-12       |
| rs10889556 | 65742140                   | LEPR | Intron      | A/G           | 0.27             | 1              | -0.076            | 0.011 | 3.74E-12       |
| rs10889558 | 65749554                   | LEPR | Intron      | G/A           | 0.27             | 0.9984         | -0.076            | 0.011 | 3.79E-12       |
| rs1327116  | 65748639                   | LEPR | Intron      | C/A           | 0.27             | 0.9985         | -0.076            | 0.011 | 3.80E-12       |
| rs7533108  | 65750432                   | LEPR | Intron      | G/C           | 0.27             | 0.9983         | -0.076            | 0.011 | 3.83E-12       |
| rs12068561 | 65746541                   | LEPR | Intron      | C/T           | 0.27             | 0.9988         | -0.076            | 0.011 | 3.84E-12       |
| rs10889557 | 65743292                   | LEPR | Intron      | G/A           | 0.28             | 0.9587         | -0.076            | 0.011 | 3.94E-12       |
| rs4655680  | 65814057                   | LEPR | Intron      | G/T           | 0.29             | 0.9884         | -0.074            | 0.011 | 4.03E-12       |
| rs6697315  | 65766144                   | LEPR | Intron      | T/C           | 0.36             | 1              | -0.070            | 0.010 | 5.30E-12       |
| rs3828039  | 65826144                   | LEPR | Intron      | A/G           | 0.28             | 0.9764         | -0.074            | 0.011 | 5.57E-12       |
| rs11208674 | 65811905                   | LEPR | Intron      | T/C           | 0.29             | 1              | -0.073            | 0.010 | 5.66E-12       |
| rs12033452 | 65811023                   | LEPR | Intron      | C/A           | 0.29             | 1              | -0.073            | 0.010 | 5.66E-12       |
| rs4655518  | 65812446                   | LEPR | Intron      | T/G           | 0.29             | 1              | -0.073            | 0.010 | 5.66E-12       |
| rs6657632  | 65811254                   | LEPR | Intron      | A/G           | 0.29             | 1              | -0.073            | 0.010 | 5.66E-12       |
| rs2104564  | 65742018                   | LEPR | Intron      | T/C           | 0.27             | 1              | -0.076            | 0.011 | 5.87E-12       |
| rs12042884 | 65825780                   | LEPR | Intron      | C/G           | 0.28             | 0.9771         | -0.074            | 0.011 | 5.89E-12       |
| rs1782754  | 65765936                   | LEPR | Intron      | A/G           | 0.27             | 0.9992         | -0.075            | 0.011 | 6.71E-12       |
| rs12042877 | 65825736                   | LEPR | Intron      | C/T           | 0.28             | 0.9784         | -0.074            | 0.011 | 6.76E-12       |
| rs12028951 | 65825669                   | LEPR | Intron      | G/A           | 0.28             | 0.9788         | -0.073            | 0.011 | 7.08E-12       |
| rs4370791  | 65824816                   | LEPR | Intron      | A/G           | 0.28             | 0.9807         | -0.073            | 0.011 | 7.29E-12       |
| rs1475398  | 65755845                   | LEPR | Intron      | G/C           | 0.27             | 1              | -0.075            | 0.011 | 8.01E-12       |
| rs11208657 | 65745941                   | LEPR | Intron      | A/G           | 0.28             | 0.9610         | -0.075            | 0.011 | 8.09E-12       |

|            |          |      |                         |     |      |        |        |       |          |
|------------|----------|------|-------------------------|-----|------|--------|--------|-------|----------|
| rs1171270  | 65770429 | LEPR | Intron                  | A/G | 0.27 | 0.9995 | -0.075 | 0.011 | 8.12E-12 |
| rs1171269  | 65769390 | LEPR | Intron                  | C/T | 0.27 | 0.9996 | -0.075 | 0.011 | 8.18E-12 |
| rs1171271  | 65771378 | LEPR | Intron                  | T/C | 0.27 | 0.9995 | -0.075 | 0.011 | 8.19E-12 |
| rs1177681  | 65771707 | LEPR | Intron                  | A/G | 0.27 | 0.9996 | -0.075 | 0.011 | 8.19E-12 |
| rs1022981  | 65772622 | LEPR | Intron                  | A/G | 0.27 | 0.9997 | -0.075 | 0.011 | 8.20E-12 |
| rs1171272  | 65772399 | LEPR | Intron                  | T/G | 0.27 | 0.9996 | -0.075 | 0.011 | 8.20E-12 |
| rs6676495  | 65824705 | LEPR | Intron                  | G/A | 0.28 | 0.9845 | -0.073 | 0.011 | 8.88E-12 |
| rs1171262  | 65774334 | LEPR | Intron                  | T/A | 0.27 | 0.9984 | -0.075 | 0.011 | 9.86E-12 |
| rs1171263  | 65774521 | LEPR | Intron                  | C/T | 0.27 | 0.9968 | -0.075 | 0.011 | 1.09E-11 |
| rs1171264  | 65775602 | LEPR | Intron                  | G/C | 0.27 | 0.9945 | -0.074 | 0.011 | 1.48E-11 |
| rs1171267  | 65776442 | LEPR | Intron                  | G/T | 0.36 | 0.9857 | -0.069 | 0.010 | 1.59E-11 |
| rs12038998 | 65821716 | LEPR | Intron                  | C/A | 0.28 | 0.9946 | -0.072 | 0.011 | 1.59E-11 |
| rs4655528  | 65822077 | LEPR | Intron                  | A/G | 0.28 | 0.9946 | -0.072 | 0.011 | 1.62E-11 |
| rs11208676 | 65820711 | LEPR | Intron                  | A/G | 0.28 | 0.9945 | -0.072 | 0.011 | 1.69E-11 |
| rs11208677 | 65821005 | LEPR | Intron                  | A/G | 0.28 | 0.9944 | -0.072 | 0.011 | 1.72E-11 |
| rs10493379 | 65818515 | LEPR | Intron                  | G/A | 0.28 | 1      | -0.072 | 0.011 | 1.83E-11 |
| rs11208679 | 65822326 | LEPR | Intron                  | G/A | 0.28 | 0.9998 | -0.072 | 0.011 | 1.83E-11 |
| rs6691346  | 65818985 | LEPR | Intron                  | G/A | 0.28 | 0.9999 | -0.072 | 0.011 | 1.83E-11 |
| rs11208675 | 65818012 | LEPR | Intron                  | T/G | 0.28 | 0.9999 | -0.072 | 0.011 | 1.83E-11 |
| rs1343981  | 65817916 | LEPR | Intron                  | A/G | 0.28 | 0.9999 | -0.072 | 0.011 | 1.83E-11 |
| rs1343982  | 65817839 | LEPR | Intron                  | C/T | 0.28 | 0.9999 | -0.072 | 0.011 | 1.83E-11 |
| rs3790424  | 65816601 | LEPR | Intron                  | A/G | 0.28 | 0.9999 | -0.072 | 0.011 | 1.83E-11 |
| rs1938487  | 65819855 | LEPR | Intron                  | T/C | 0.28 | 0.9998 | -0.072 | 0.011 | 1.84E-11 |
| rs3790425  | 65815700 | LEPR | Intron                  | A/G | 0.28 | 1      | -0.071 | 0.011 | 1.92E-11 |
| rs1171261  | 65773990 | LEPR | Intron                  | C/T | 0.27 | 1      | -0.074 | 0.011 | 2.08E-11 |
| rs6696954  | 65827583 | LEPR | Intron                  | G/T | 0.37 | 0.8718 | 0.072  | 0.011 | 2.30E-11 |
| rs1409802  | 65793939 | LEPR | Intron                  | G/A | 0.27 | 0.9861 | -0.074 | 0.011 | 3.01E-11 |
| rs1171265  | 65775840 | LEPR | Intron                  | G/A | 0.37 | 0.8990 | -0.070 | 0.010 | 3.70E-11 |
| rs6676419  | 65824797 | LEPR | Intron                  | C/T | 0.50 | 0.9662 | -0.063 | 0.010 | 4.48E-11 |
| rs6673324  | 65803651 | LEPR | Intron                  | A/G | 0.50 | 0.9932 | 0.063  | 0.009 | 4.55E-11 |
| rs7519977  | 65806084 | LEPR | Intron                  | G/A | 0.27 | 0.9975 | -0.072 | 0.011 | 6.97E-11 |
| rs4655517  | 65812013 | LEPR | Intron                  | T/C | 0.50 | 0.9987 | 0.062  | 0.009 | 7.13E-11 |
| rs10158279 | 65806284 | LEPR | Intron                  | G/T | 0.50 | 1      | 0.062  | 0.009 | 7.46E-11 |
| rs10789184 | 65809550 | LEPR | Intron                  | G/A | 0.27 | 1      | -0.072 | 0.011 | 9.24E-11 |
| rs1137100  | 65809029 | LEPR | Missense<br>(Lys109Arg) | A/G | 0.27 | 1      | -0.072 | 0.011 | 9.24E-11 |
| rs3790427  | 65815338 | LEPR | Intron                  | T/C | 0.27 | 0.9982 | -0.071 | 0.011 | 1.02E-10 |
| rs10789186 | 65823065 | LEPR | Intron                  | G/A | 0.50 | 0.9779 | -0.062 | 0.009 | 1.06E-10 |
| rs10889563 | 65821755 | LEPR | Intron                  | A/G | 0.49 | 0.9795 | -0.061 | 0.009 | 1.11E-10 |

|            |          |      |                         |     |      |        |        |       |          |
|------------|----------|------|-------------------------|-----|------|--------|--------|-------|----------|
| rs6673591  | 65820977 | LEPR | Intron                  | A/G | 0.49 | 0.9827 | -0.061 | 0.009 | 1.18E-10 |
| rs10789185 | 65818452 | LEPR | Intron                  | G/C | 0.49 | 0.9907 | -0.061 | 0.009 | 1.49E-10 |
| rs10889568 | 65832033 | LEPR | Intron                  | T/C | 0.26 | 0.9970 | -0.070 | 0.011 | 1.56E-10 |
| rs12405556 | 65835705 | LEPR | Intron                  | G/T | 0.26 | 1      | -0.070 | 0.011 | 1.58E-10 |
| rs4655539  | 65832251 | LEPR | Intron                  | A/T | 0.44 | 0.9692 | -0.061 | 0.010 | 1.77E-10 |
| rs10732836 | 65832048 | LEPR | Intron                  | C/T | 0.44 | 0.9705 | -0.061 | 0.010 | 1.78E-10 |
| rs6669117  | 65833660 | LEPR | Intron                  | T/C | 0.44 | 0.9684 | -0.061 | 0.010 | 1.78E-10 |
| rs4655537  | 65831389 | LEPR | Intron                  | G/A | 0.39 | 0.9086 | 0.066  | 0.010 | 1.85E-10 |
| rs1137101  | 65831101 | LEPR | Missense<br>(Gln223Arg) | A/G | 0.44 | 0.9752 | -0.061 | 0.010 | 1.91E-10 |
| rs2154380  | 65830029 | LEPR | Intron                  | T/C | 0.44 | 0.9777 | -0.061 | 0.010 | 2.04E-10 |
| rs11208682 | 65829184 | LEPR | Intron                  | G/A | 0.44 | 0.9766 | -0.061 | 0.010 | 2.06E-10 |
| rs10736402 | 65830588 | LEPR | Intron                  | C/T | 0.44 | 0.9759 | -0.061 | 0.010 | 2.06E-10 |
| rs10449758 | 65829705 | LEPR | Intron                  | A/G | 0.44 | 0.9786 | -0.061 | 0.010 | 2.08E-10 |
| rs12564626 | 65829130 | LEPR | Intron                  | G/A | 0.44 | 0.9740 | -0.061 | 0.010 | 2.13E-10 |
| rs10749754 | 65827228 | LEPR | Intron                  | G/A | 0.44 | 0.9660 | -0.061 | 0.010 | 2.34E-10 |
| rs1475397  | 65755746 | LEPR | Intron                  | C/T | 0.26 | 1      | 0.069  | 0.011 | 2.92E-10 |
| rs10889567 | 65829638 | LEPR | Intron                  | T/C | 0.45 | 1      | -0.059 | 0.009 | 3.10E-10 |
| rs10157275 | 65739091 | LEPR | Intron                  | C/T | 0.13 | 0.9917 | 0.087  | 0.014 | 5.09E-10 |
| rs1782763  | 65780488 | LEPR | Intron                  | T/C | 0.33 | 0.9858 | -0.065 | 0.010 | 5.77E-10 |
| rs10158579 | 65722644 | LEPR | Intron                  | T/C | 0.13 | 0.9996 | 0.086  | 0.014 | 5.95E-10 |
| rs11808888 | 65725369 | LEPR | Intron                  | G/A | 0.13 | 0.9988 | 0.086  | 0.014 | 6.17E-10 |
| rs9436302  | 65669149 | LEPR | Intron                  | G/A | 0.20 | 0.8588 | 0.080  | 0.013 | 6.75E-10 |
| rs17127673 | 65728313 | LEPR | Intron                  | A/G | 0.14 | 1      | 0.085  | 0.014 | 6.80E-10 |
| rs10128072 | 65729684 | LEPR | Intron                  | A/C | 0.13 | 1      | 0.086  | 0.014 | 7.64E-10 |
| rs7602     | 65670539 | LEPR | Intron                  | G/A | 0.20 | 0.9984 | 0.072  | 0.012 | 8.57E-10 |
| rs17127677 | 65730862 | LEPR | Intron                  | G/T | 0.13 | 0.9989 | 0.085  | 0.014 | 8.59E-10 |
| rs11800275 | 65736292 | LEPR | Intron                  | T/A | 0.13 | 0.9979 | 0.085  | 0.014 | 9.49E-10 |
| rs6694528  | 65735604 | LEPR | Intron                  | C/T | 0.13 | 0.9979 | 0.085  | 0.014 | 9.49E-10 |
| rs17127690 | 65735537 | LEPR | Intron                  | A/G | 0.13 | 0.9980 | 0.085  | 0.014 | 9.52E-10 |
| rs9436303  | 65669262 | LEPR | Intron                  | A/G | 0.24 | 0.8981 | 0.070  | 0.012 | 2.53E-09 |
| rs1171279  | 65761081 | LEPR | Intron                  | C/T | 0.26 | 0.9859 | 0.065  | 0.011 | 2.96E-09 |
| rs6690625  | 65850178 | LEPR | Intron                  | T/G | 0.19 | 0.9591 | -0.073 | 0.013 | 5.98E-09 |
| rs12040007 | 65852748 | LEPR | Intron                  | G/A | 0.19 | 0.9589 | -0.073 | 0.013 | 6.78E-09 |
| rs4655556  | 65853151 | LEPR | Intron                  | G/A | 0.19 | 0.9591 | -0.073 | 0.013 | 8.0E-09  |
| rs1938484  | 65853870 | LEPR | Intron                  | C/A | 0.19 | 0.9590 | -0.073 | 0.013 | 8.0E-09  |
| rs9436300  | 65667852 | LEPR | Intron                  | G/A | 0.33 | 0.7046 | -0.069 | 0.012 | 1.5E-08  |
| rs7534511  | 65667718 | LEPR | Intron                  | G/A | 0.34 | 0.6901 | -0.070 | 0.012 | 1.6E-08  |
| rs12567606 | 65914472 | NA   | NA                      | A/G | 0.22 | 0.9645 | -0.067 | 0.012 | 1.7E-08  |

|            |          |             |        |     |      |        |        |       |         |
|------------|----------|-------------|--------|-----|------|--------|--------|-------|---------|
| rs1046011  | 65671584 | <i>LEPR</i> | Intron | C/T | 0.30 | 0.9014 | -0.062 | 0.011 | 2.0E-08 |
| rs4655555  | 65852857 | <i>LEPR</i> | Intron | T/A | 0.22 | 0.8930 | -0.069 | 0.012 | 2.3E-08 |
| rs6667615  | 65935218 | NA          | NA     | G/A | 0.21 | 0.8965 | -0.070 | 0.013 | 2.6E-08 |
| rs6588156  | 65933021 | NA          | NA     | G/A | 0.21 | 0.9100 | -0.069 | 0.012 | 2.6E-08 |
| rs6667616  | 65935219 | NA          | NA     | C/A | 0.21 | 0.8877 | -0.070 | 0.013 | 2.7E-08 |
| rs4655583  | 65927995 | NA          | NA     | C/A | 0.22 | 0.9463 | -0.067 | 0.012 | 2.7E-08 |
| rs6664534  | 65932663 | NA          | NA     | A/T | 0.21 | 0.9192 | -0.069 | 0.012 | 3.0E-08 |
| rs9436301  | 65668515 | <i>LEPR</i> | Intron | T/C | 0.24 | 0.8046 | 0.069  | 0.012 | 3.0E-08 |
| rs4655795  | 65931956 | NA          | NA     | G/T | 0.21 | 0.9222 | -0.069 | 0.012 | 3.2E-08 |
| rs4394621  | 65938424 | NA          | NA     | A/G | 0.21 | 0.8792 | -0.070 | 0.013 | 3.4E-08 |
| rs4655792  | 65931852 | NA          | NA     | T/G | 0.20 | 0.9456 | -0.068 | 0.012 | 3.6E-08 |
| rs12130476 | 65897438 | NA          | NA     | G/C | 0.20 | 0.9761 | -0.068 | 0.012 | 3.7E-08 |
| rs2186245  | 65890652 | NA          | NA     | C/T | 0.19 | 0.9787 | -0.068 | 0.012 | 3.8E-08 |
| rs4655793  | 65931866 | NA          | NA     | C/A | 0.21 | 0.9378 | -0.068 | 0.012 | 3.9E-08 |
| rs7518632  | 65875938 | NA          | NA     | C/A | 0.19 | 0.9894 | -0.068 | 0.012 | 4.1E-08 |
| rs3762274  | 65836701 | <i>LEPR</i> | Intron | T/C | 0.37 | 0.9232 | -0.055 | 0.010 | 4.4E-08 |
| rs1892535  | 65869769 | <i>LEPR</i> | Intron | G/A | 0.19 | 0.9936 | -0.068 | 0.012 | 4.5E-08 |
| rs12145237 | 65897470 | NA          | NA     | C/T | 0.20 | 0.9762 | -0.067 | 0.012 | 4.6E-08 |
| rs12043772 | 65907622 | NA          | NA     | T/A | 0.20 | 0.9860 | -0.066 | 0.012 | 4.8E-08 |

<sup>a</sup>n = 1,504; sOB-R levels were transformed on a natural logarithm scale. <sup>b</sup>Position based on NCBI build 36.3. <sup>c</sup>Minor allele frequency among study participants. <sup>d</sup>Regression coefficients and *P* values for every one copy of minor allele were estimated from linear regression models adjusted for age at blood draw, diabetes case-control status, fasting status, body mass index, menopausal status, and postmenopausal hormone use..

**Supplementary Table 3.** Top genotyped and imputed SNPs ( $P < 1 \times 10^{-6}$ ) for plasma sOB-R<sup>a</sup> among controls

| SNP        | Position (bp) <sup>b</sup> | Gene | Gene region | Alleles (+/-) | MAF <sup>c</sup> | Beta <sup>d</sup> | s.e.  | P <sup>d</sup> |
|------------|----------------------------|------|-------------|---------------|------------------|-------------------|-------|----------------|
| rs2767485  | 65751505                   | LEPR | Intron      | T/C           | 0.17             | 0.104             | 0.017 | 5.97E-10       |
| rs12079231 | 65743743                   | LEPR | Intron      | C/G           | 0.17             | 0.104             | 0.017 | 6.13E-10       |
| rs11208656 | 65743375                   | LEPR | Intron      | A/G           | 0.17             | 0.104             | 0.017 | 6.17E-10       |
| rs12062820 | 65743083                   | LEPR | Intron      | T/C           | 0.17             | 0.104             | 0.017 | 6.17E-10       |
| rs1171275  | 65755221                   | LEPR | Intron      | C/T           | 0.17             | 0.101             | 0.017 | 1.20E-09       |
| rs1180445  | 65755507                   | LEPR | Intron      | T/C           | 0.17             | 0.101             | 0.017 | 1.20E-09       |
| rs1627238  | 65758667                   | LEPR | Intron      | G/A           | 0.17             | 0.101             | 0.016 | 1.20E-09       |
| rs1782755  | 65759392                   | LEPR | Intron      | C/A           | 0.17             | 0.101             | 0.016 | 1.20E-09       |
| rs1171278  | 65760734                   | LEPR | Intron      | C/T           | 0.17             | 0.100             | 0.017 | 2.45E-09       |
| rs1171276  | 65760037                   | LEPR | Intron      | A/G           | 0.19             | 0.100             | 0.017 | 2.75E-09       |
| rs2104564  | 65742018                   | LEPR | Intron      | T/C           | 0.27             | -0.091            | 0.016 | 8.69E-09       |
| rs7516840  | 65745183                   | LEPR | Intron      | G/C           | 0.27             | -0.090            | 0.016 | 1.11E-08       |
| rs10889556 | 65742140                   | LEPR | Intron      | A/G           | 0.27             | -0.090            | 0.016 | 1.13E-08       |
| rs1171274  | 65753426                   | LEPR | Intron      | T/C           | 0.27             | -0.090            | 0.016 | 1.13E-08       |
| rs10889558 | 65749554                   | LEPR | Intron      | G/A           | 0.27             | -0.090            | 0.016 | 1.14E-08       |
| rs7533108  | 65750432                   | LEPR | Intron      | G/C           | 0.27             | -0.090            | 0.016 | 1.14E-08       |
| rs1327116  | 65748639                   | LEPR | Intron      | C/A           | 0.27             | -0.090            | 0.016 | 1.14E-08       |
| rs12068561 | 65746541                   | LEPR | Intron      | C/T           | 0.27             | -0.090            | 0.016 | 1.14E-08       |
| rs1475398  | 65755845                   | LEPR | Intron      | G/C           | 0.27             | -0.089            | 0.016 | 1.80E-08       |
| rs6697315  | 65766144                   | LEPR | Intron      | T/C           | 0.36             | -0.081            | 0.014 | 1.81E-08       |
| rs1751492  | 65765213                   | LEPR | Intron      | T/C           | 0.30             | -0.084            | 0.015 | 1.85E-08       |
| rs11208657 | 65745941                   | LEPR | Intron      | A/G           | 0.28             | -0.088            | 0.016 | 2.07E-08       |
| rs10889557 | 65743292                   | LEPR | Intron      | G/A           | 0.28             | -0.088            | 0.016 | 2.52E-08       |
| rs1186403  | 65773121                   | LEPR | Intron      | T/C           | 0.30             | -0.083            | 0.015 | 2.80E-08       |
| rs2154381  | 65768289                   | LEPR | Intron      | A/G           | 0.30             | -0.083            | 0.015 | 2.80E-08       |
| rs1171265  | 65775840                   | LEPR | Intron      | G/A           | 0.37             | -0.082            | 0.015 | 3.89E-08       |
| rs1171267  | 65776442                   | LEPR | Intron      | G/T           | 0.36             | -0.079            | 0.014 | 4.92E-08       |
| rs1171266  | 65776412                   | LEPR | Intron      | C/T           | 0.30             | -0.082            | 0.015 | 5.36E-08       |
| rs1782754  | 65765936                   | LEPR | Intron      | A/G           | 0.27             | -0.086            | 0.016 | 5.76E-08       |
| rs1171270  | 65770429                   | LEPR | Intron      | A/G           | 0.27             | -0.085            | 0.016 | 7.82E-08       |
| rs1171269  | 65769390                   | LEPR | Intron      | C/T           | 0.27             | -0.085            | 0.016 | 7.84E-08       |
| rs1171271  | 65771378                   | LEPR | Intron      | T/C           | 0.27             | -0.085            | 0.016 | 7.88E-08       |
| rs1177681  | 65771707                   | LEPR | Intron      | A/G           | 0.27             | -0.085            | 0.016 | 7.88E-08       |
| rs1022981  | 65772622                   | LEPR | Intron      | A/G           | 0.27             | -0.085            | 0.016 | 7.89E-08       |
| rs1171272  | 65772399                   | LEPR | Intron      | T/G           | 0.27             | -0.085            | 0.016 | 7.89E-08       |
| rs1171262  | 65774334                   | LEPR | Intron      | T/A           | 0.27             | -0.085            | 0.016 | 8.21E-08       |
| rs1171263  | 65774521                   | LEPR | Intron      | C/T           | 0.27             | -0.085            | 0.016 | 8.59E-08       |

|            |          |             |                         |     |      |        |       |          |
|------------|----------|-------------|-------------------------|-----|------|--------|-------|----------|
| rs4655680  | 65814057 | <i>LEPR</i> | Intron                  | G/T | 0.29 | -0.081 | 0.015 | 1.04E-07 |
| rs1171264  | 65775602 | <i>LEPR</i> | Intron                  | G/C | 0.27 | -0.084 | 0.016 | 1.05E-07 |
| rs11208674 | 65811905 | <i>LEPR</i> | Intron                  | T/C | 0.29 | -0.080 | 0.015 | 1.07E-07 |
| rs12033452 | 65811023 | <i>LEPR</i> | Intron                  | C/A | 0.29 | -0.080 | 0.015 | 1.07E-07 |
| rs4655518  | 65812446 | <i>LEPR</i> | Intron                  | T/G | 0.29 | -0.080 | 0.015 | 1.07E-07 |
| rs6657632  | 65811254 | <i>LEPR</i> | Intron                  | A/G | 0.29 | -0.080 | 0.015 | 1.07E-07 |
| rs1171261  | 65773990 | <i>LEPR</i> | Intron                  | C/T | 0.27 | -0.084 | 0.016 | 1.27E-07 |
| rs3828039  | 65826144 | <i>LEPR</i> | Intron                  | A/G | 0.28 | -0.080 | 0.015 | 2.00E-07 |
| rs12042884 | 65825780 | <i>LEPR</i> | Intron                  | C/G | 0.28 | -0.080 | 0.015 | 2.10E-07 |
| rs1782763  | 65780488 | <i>LEPR</i> | Intron                  | T/C | 0.33 | -0.078 | 0.015 | 2.27E-07 |
| rs1409802  | 65793939 | <i>LEPR</i> | Intron                  | G/A | 0.27 | -0.082 | 0.016 | 2.38E-07 |
| rs12042877 | 65825736 | <i>LEPR</i> | Intron                  | C/T | 0.28 | -0.079 | 0.015 | 2.39E-07 |
| rs12028951 | 65825669 | <i>LEPR</i> | Intron                  | G/A | 0.28 | -0.079 | 0.015 | 2.44E-07 |
| rs4370791  | 65824816 | <i>LEPR</i> | Intron                  | A/G | 0.28 | -0.079 | 0.015 | 2.46E-07 |
| rs7519977  | 65806084 | <i>LEPR</i> | Intron                  | G/A | 0.27 | -0.081 | 0.016 | 2.75E-07 |
| rs6676495  | 65824705 | <i>LEPR</i> | Intron                  | G/A | 0.28 | -0.079 | 0.015 | 2.78E-07 |
| rs12405556 | 65835705 | <i>LEPR</i> | Intron                  | G/T | 0.26 | -0.081 | 0.016 | 2.81E-07 |
| rs10789184 | 65809550 | <i>LEPR</i> | Intron                  | G/A | 0.27 | -0.081 | 0.016 | 2.98E-07 |
| rs1137100  | 65809029 | <i>LEPR</i> | Missense<br>(Lys109Arg) | A/G | 0.27 | -0.081 | 0.016 | 2.98E-07 |
| rs3790427  | 65815338 | <i>LEPR</i> | Intron                  | T/C | 0.27 | -0.081 | 0.016 | 3.23E-07 |
| rs10889568 | 65832033 | <i>LEPR</i> | Intron                  | T/C | 0.26 | -0.080 | 0.016 | 3.25E-07 |
| rs10493379 | 65818515 | <i>LEPR</i> | Intron                  | G/A | 0.28 | -0.076 | 0.015 | 5.12E-07 |
| rs11208675 | 65818012 | <i>LEPR</i> | Intron                  | T/G | 0.28 | -0.076 | 0.015 | 5.12E-07 |
| rs11208679 | 65822326 | <i>LEPR</i> | Intron                  | G/A | 0.28 | -0.076 | 0.015 | 5.12E-07 |
| rs1343981  | 65817916 | <i>LEPR</i> | Intron                  | A/G | 0.28 | -0.076 | 0.015 | 5.12E-07 |
| rs1343982  | 65817839 | <i>LEPR</i> | Intron                  | C/T | 0.28 | -0.076 | 0.015 | 5.12E-07 |
| rs1938487  | 65819855 | <i>LEPR</i> | Intron                  | T/C | 0.28 | -0.076 | 0.015 | 5.12E-07 |
| rs3790424  | 65816601 | <i>LEPR</i> | Intron                  | A/G | 0.28 | -0.076 | 0.015 | 5.12E-07 |
| rs3790425  | 65815700 | <i>LEPR</i> | Intron                  | A/G | 0.28 | -0.076 | 0.015 | 5.12E-07 |
| rs6691346  | 65818985 | <i>LEPR</i> | Intron                  | G/A | 0.28 | -0.076 | 0.015 | 5.12E-07 |
| rs12038998 | 65821716 | <i>LEPR</i> | Intron                  | C/A | 0.28 | -0.077 | 0.015 | 5.28E-07 |
| rs4655528  | 65822077 | <i>LEPR</i> | Intron                  | A/G | 0.28 | -0.077 | 0.015 | 5.28E-07 |
| rs11208676 | 65820711 | <i>LEPR</i> | Intron                  | A/G | 0.28 | -0.076 | 0.015 | 5.39E-07 |
| rs11208677 | 65821005 | <i>LEPR</i> | Intron                  | A/G | 0.28 | -0.076 | 0.015 | 5.44E-07 |
| rs17127673 | 65728313 | <i>LEPR</i> | Intron                  | A/G | 0.14 | 0.091  | 0.018 | 7.94E-07 |
| rs7602     | 65670539 | <i>LEPR</i> | Intron                  | G/A | 0.20 | 0.079  | 0.016 | 8.80E-07 |
| rs10157275 | 65739091 | <i>LEPR</i> | Intron                  | C/T | 0.13 | 0.091  | 0.018 | 9.50E-07 |

---

<sup>a</sup>sOB-R levels were log-transformed. n = 820. <sup>b</sup>Position based on NCBI build 36.3. <sup>c</sup>Minor allele frequency among study participants. <sup>d</sup>Regression coefficients and *P* values for every one copy of minor allele were estimated from linear regression models adjusted for age at blood draw, fasting status, body mass index, menopausal status, and postmenopausal hormone use.



**Supplementary Table 4.** Top genotyped and imputed SNPs (combined  $P < 5 \times 10^{-8}$ ) for plasma sOB-R<sup>a</sup> in a meta-analysis pooling results of cases and controls.

| SNP        | Gene        | Gene region | Left Gene     | Right Gene          | Alleles (+/-) | $z$ score <sup>b</sup> | $P$ <sup>c</sup> | Direction <sup>d</sup> |
|------------|-------------|-------------|---------------|---------------------|---------------|------------------------|------------------|------------------------|
| rs2767485  | <i>LEPR</i> | Intron      | <i>LEPROT</i> | <i>LOC100128633</i> | T/C           | 7.883                  | 3.19E-15         | ++                     |
| rs12079231 | <i>LEPR</i> | Intron      | <i>LEPROT</i> | <i>LOC100128633</i> | C/G           | 7.861                  | 3.83E-15         | ++                     |
| rs12062820 | <i>LEPR</i> | Intron      | <i>LEPROT</i> | <i>LOC100128633</i> | T/C           | 7.856                  | 3.98E-15         | ++                     |
| rs11208656 | <i>LEPR</i> | Intron      | <i>LEPROT</i> | <i>LOC100128633</i> | A/G           | 7.856                  | 3.98E-15         | ++                     |
| rs1782755  | <i>LEPR</i> | Intron      | <i>LEPROT</i> | <i>LOC100128633</i> | C/A           | 7.838                  | 4.56E-15         | ++                     |
| rs1627238  | <i>LEPR</i> | Intron      | <i>LEPROT</i> | <i>LOC100128633</i> | G/A           | 7.835                  | 4.68E-15         | ++                     |
| rs1171275  | <i>LEPR</i> | Intron      | <i>LEPROT</i> | <i>LOC100128633</i> | C/T           | 7.800                  | 6.20E-15         | ++                     |
| rs1180445  | <i>LEPR</i> | Intron      | <i>LEPROT</i> | <i>LOC100128633</i> | T/C           | 7.800                  | 6.20E-15         | ++                     |
| rs1171278  | <i>LEPR</i> | Intron      | <i>LEPROT</i> | <i>LOC100128633</i> | C/T           | 7.708                  | 1.27E-14         | ++                     |
| rs1171276  | <i>LEPR</i> | Intron      | <i>LEPROT</i> | <i>LOC100128633</i> | A/G           | 7.574                  | 3.61E-14         | ++                     |
| rs1751492  | <i>LEPR</i> | Intron      | <i>LEPROT</i> | <i>LOC100128633</i> | T/C           | -7.524                 | 5.30E-14         | --                     |
| rs2154381  | <i>LEPR</i> | Intron      | <i>LEPROT</i> | <i>LOC100128633</i> | A/G           | -7.483                 | 7.27E-14         | --                     |
| rs1186403  | <i>LEPR</i> | Intron      | <i>LEPROT</i> | <i>LOC100128633</i> | T/C           | -7.480                 | 7.45E-14         | --                     |
| rs1171266  | <i>LEPR</i> | Intron      | <i>LEPROT</i> | <i>LOC100128633</i> | C/T           | -7.323                 | 2.42E-13         | --                     |
| rs6697315  | <i>LEPR</i> | Intron      | <i>LEPROT</i> | <i>LOC100128633</i> | T/C           | -7.274                 | 3.50E-13         | --                     |
| rs7516840  | <i>LEPR</i> | Intron      | <i>LEPROT</i> | <i>LOC100128633</i> | G/C           | -7.202                 | 5.93E-13         | --                     |
| rs10889556 | <i>LEPR</i> | Intron      | <i>LEPROT</i> | <i>LOC100128633</i> | A/G           | -7.200                 | 6.02E-13         | --                     |
| rs1171274  | <i>LEPR</i> | Intron      | <i>LEPROT</i> | <i>LOC100128633</i> | T/C           | -7.199                 | 6.07E-13         | --                     |
| rs12068561 | <i>LEPR</i> | Intron      | <i>LEPROT</i> | <i>LOC100128633</i> | C/T           | -7.196                 | 6.21E-13         | --                     |
| rs10889558 | <i>LEPR</i> | Intron      | <i>LEPROT</i> | <i>LOC100128633</i> | G/A           | -7.194                 | 6.29E-13         | --                     |
| rs1327116  | <i>LEPR</i> | Intron      | <i>LEPROT</i> | <i>LOC100128633</i> | C/A           | -7.194                 | 6.30E-13         | --                     |
| rs7533108  | <i>LEPR</i> | Intron      | <i>LEPROT</i> | <i>LOC100128633</i> | G/C           | -7.192                 | 6.38E-13         | --                     |
| rs10889557 | <i>LEPR</i> | Intron      | <i>LEPROT</i> | <i>LOC100128633</i> | G/A           | -7.167                 | 7.67E-13         | --                     |
| rs4655680  | <i>LEPR</i> | Intron      | <i>LEPROT</i> | <i>LOC100128633</i> | G/T           | -7.165                 | 7.76E-13         | --                     |
| rs1782754  | <i>LEPR</i> | Intron      | <i>LEPROT</i> | <i>LOC100128633</i> | A/G           | -7.135                 | 9.66E-13         | --                     |
| rs2104564  | <i>LEPR</i> | Intron      | <i>LEPROT</i> | <i>LOC100128633</i> | T/C           | -7.132                 | 9.87E-13         | --                     |
| rs12033452 | <i>LEPR</i> | Intron      | <i>LEPROT</i> | <i>LOC100128633</i> | C/A           | -7.110                 | 1.16E-12         | --                     |
| rs4655518  | <i>LEPR</i> | Intron      | <i>LEPROT</i> | <i>LOC100128633</i> | T/G           | -7.110                 | 1.16E-12         | --                     |
| rs6657632  | <i>LEPR</i> | Intron      | <i>LEPROT</i> | <i>LOC100128633</i> | A/G           | -7.110                 | 1.16E-12         | --                     |
| rs11208674 | <i>LEPR</i> | Intron      | <i>LEPROT</i> | <i>LOC100128633</i> | T/C           | -7.110                 | 1.16E-12         | --                     |
| rs1171269  | <i>LEPR</i> | Intron      | <i>LEPROT</i> | <i>LOC100128633</i> | A/G           | -7.097                 | 1.28E-12         | --                     |
| rs1171270  | <i>LEPR</i> | Intron      | <i>LEPROT</i> | <i>LOC100128633</i> | C/T           | -7.096                 | 1.28E-12         | --                     |
| rs1022981  | <i>LEPR</i> | Intron      | <i>LEPROT</i> | <i>LOC100128633</i> | T/C           | -7.096                 | 1.29E-12         | --                     |
| rs1171271  | <i>LEPR</i> | Intron      | <i>LEPROT</i> | <i>LOC100128633</i> | A/G           | -7.096                 | 1.29E-12         | --                     |
| rs1171272  | <i>LEPR</i> | Intron      | <i>LEPROT</i> | <i>LOC100128633</i> | A/G           | -7.095                 | 1.29E-12         | --                     |
| rs1177681  | <i>LEPR</i> | Intron      | <i>LEPROT</i> | <i>LOC100128633</i> | T/G           | -7.095                 | 1.29E-12         | --                     |

|            |      |                         |              |              |     |        |          |    |
|------------|------|-------------------------|--------------|--------------|-----|--------|----------|----|
| rs3828039  | LEPR | Intron                  | LOC100128633 | PDE4B        | A/G | -7.094 | 1.31E-12 | -- |
| rs12042884 | LEPR | Intron                  | LEPROT       | LOC100128633 | C/G | -7.089 | 1.35E-12 | -- |
| rs11208657 | LEPR | Intron                  | LOC100128633 | PDE4B        | A/G | -7.09  | 1.35E-12 | -- |
| rs1475398  | LEPR | Intron                  | LEPROT       | LOC100128633 | G/C | -7.083 | 1.41E-12 | -- |
| rs1171267  | LEPR | Intron                  | LEPROT       | LOC100128633 | G/T | -7.082 | 1.43E-12 | -- |
| rs1171262  | LEPR | Intron                  | LEPROT       | LOC100128633 | T/A | -7.068 | 1.57E-12 | -- |
| rs12042877 | LEPR | Intron                  | LOC100128633 | PDE4B        | C/T | -7.067 | 1.58E-12 | -- |
| rs12028951 | LEPR | Intron                  | LOC100128633 | PDE4B        | G/A | -7.062 | 1.65E-12 | -- |
| rs4370791  | LEPR | Intron                  | LOC100128633 | PDE4B        | A/G | -7.059 | 1.68E-12 | -- |
| rs1171263  | LEPR | Intron                  | LEPROT       | LOC100128633 | C/T | -7.053 | 1.75E-12 | -- |
| rs6676495  | LEPR | Intron                  | LOC100128633 | PDE4B        | G/A | -7.035 | 1.99E-12 | -- |
| rs1171264  | LEPR | Intron                  | LEPROT       | LOC100128633 | G/C | -7.008 | 2.41E-12 | -- |
| rs6696954  | LEPR | Intron                  | LOC100128633 | PDE4B        | G/T | -6.987 | 2.81E-12 | -- |
| rs12038998 | LEPR | Intron                  | LOC100128633 | PDE4B        | C/A | -6.965 | 3.27E-12 | -- |
| rs4655528  | LEPR | Intron                  | LOC100128633 | PDE4B        | A/G | -6.964 | 3.31E-12 | -- |
| rs11208676 | LEPR | Intron                  | LOC100128633 | PDE4B        | A/G | -6.957 | 3.48E-12 | -- |
| rs11208677 | LEPR | Intron                  | LOC100128633 | PDE4B        | A/G | -6.955 | 3.52E-12 | -- |
| rs1171265  | LEPR | Intron                  | LEPROT       | LOC100128633 | G/A | -6.954 | 3.54E-12 | -- |
| rs1171261  | LEPR | Intron                  | LEPROT       | LOC100128633 | C/T | -6.945 | 3.79E-12 | -- |
| rs10493379 | LEPR | Intron                  | LOC100128633 | PDE4B        | G/A | -6.936 | 4.02E-12 | -- |
| rs11208679 | LEPR | Intron                  | LOC100128633 | PDE4B        | G/A | -6.936 | 4.02E-12 | -- |
| rs6691346  | LEPR | Intron                  | LOC100128633 | PDE4B        | G/A | -6.936 | 4.02E-12 | -- |
| rs11208675 | LEPR | Intron                  | LOC100128633 | PDE4B        | T/G | -6.936 | 4.03E-12 | -- |
| rs1343981  | LEPR | Intron                  | LOC100128633 | PDE4B        | T/C | -6.936 | 4.03E-12 | -- |
| rs1343982  | LEPR | Intron                  | LOC100128633 | PDE4B        | A/G | -6.936 | 4.03E-12 | -- |
| rs1938487  | LEPR | Intron                  | LEPROT       | PDE4B        | C/T | -6.936 | 4.03E-12 | -- |
| rs3790424  | LEPR | Intron                  | LOC100128633 | PDE4B        | A/G | -6.936 | 4.03E-12 | -- |
| rs3790425  | LEPR | Intron                  | LEPROT       | PDE4B        | A/G | -6.927 | 4.30E-12 | -- |
| rs1409802  | LEPR | Intron                  | LEPROT       | LOC100128633 | G/A | -6.898 | 5.29E-12 | -- |
| rs6673324  | LEPR | Intron                  | LEPROT       | LOC100128633 | A/G | 6.861  | 6.85E-12 | ++ |
| rs6676419  | LEPR | Intron                  | LOC100128633 | PDE4B        | C/T | -6.819 | 9.15E-12 | -- |
| rs4655517  | LEPR | Intron                  | LEPROT       | LOC100128633 | T/C | 6.787  | 1.14E-11 | ++ |
| rs10158279 | LEPR | Intron                  | LEPROT       | LOC100128633 | G/T | 6.783  | 1.18E-11 | ++ |
| rs7519977  | LEPR | Intron                  | LEPROT       | LOC100128633 | G/A | -6.760 | 1.38E-11 | -- |
| rs10789184 | LEPR | Intron                  | LEPROT       | LOC100128633 | A/G | -6.716 | 1.87E-11 | -- |
| rs1137100  | LEPR | Missense<br>(Lys109Arg) | LEPROT       | LOC100128633 | G/A | -6.716 | 1.87E-11 | -- |
| rs3790427  | LEPR | Intron                  | LEPROT       | PDE4B        | T/C | -6.713 | 1.91E-11 | -- |
| rs10889563 | LEPR | Intron                  | LOC100128633 | PDE4B        | A/G | -6.711 | 1.93E-11 | -- |

|            |      |                         |              |              |     |        |          |    |
|------------|------|-------------------------|--------------|--------------|-----|--------|----------|----|
| rs10789186 | LEPR | Intron                  | LOC100128633 | PDE4B        | G/A | -6.701 | 2.07E-11 | -- |
| rs6673591  | LEPR | Intron                  | LOC100128633 | PDE4B        | A/G | -6.699 | 2.10E-11 | -- |
| rs10789185 | LEPR | Intron                  | LOC100128633 | PDE4B        | G/C | -6.653 | 2.87E-11 | -- |
| rs12405556 | LEPR | Intron                  | LOC100128633 | PDE4B        | G/T | -6.648 | 2.96E-11 | -- |
| rs10889568 | LEPR | Intron                  | LOC100128633 | PDE4B        | T/C | -6.648 | 2.98E-11 | -- |
| rs4655537  | LEPR | Intron                  | LOC100128633 | PDE4B        | G/A | -6.645 | 3.04E-11 | ++ |
| rs4655539  | LEPR | Intron                  | LOC100128633 | PDE4B        | A/T | -6.596 | 4.23E-11 | -- |
| rs6669117  | LEPR | Intron                  | LOC100128633 | PDE4B        | T/C | -6.595 | 4.25E-11 | -- |
| rs10732836 | LEPR | Intron                  | LOC100128633 | PDE4B        | C/T | -6.594 | 4.29E-11 | -- |
| rs1137101  | LEPR | Missense<br>(Gln223Arg) | LOC100128633 | PDE4B        | A/G | -6.588 | 4.45E-11 | -- |
| rs2154380  | LEPR | Intron                  | LOC100128633 | PDE4B        | T/C | -6.576 | 4.83E-11 | -- |
| rs10736402 | LEPR | Intron                  | LOC100128633 | PDE4B        | C/T | -6.575 | 4.86E-11 | -- |
| rs10449758 | LEPR | Intron                  | LOC100128633 | PDE4B        | A/G | -6.575 | 4.88E-11 | -- |
| rs11208682 | LEPR | Intron                  | LOC100128633 | PDE4B        | G/A | -6.574 | 4.91E-11 | -- |
| rs12564626 | LEPR | Intron                  | LOC100128633 | PDE4B        | G/A | -6.571 | 5.00E-11 | -- |
| rs1782763  | LEPR | Intron                  | LEPROT       | LOC100128633 | T/C | -6.553 | 5.62E-11 | -- |
| rs10749754 | LEPR | Intron                  | LOC100128633 | PDE4B        | G/A | -6.553 | 5.65E-11 | -- |
| rs10889567 | LEPR | Intron                  | LOC100128633 | PDE4B        | T/C | -6.511 | 7.49E-11 | -- |
| rs10157275 | LEPR | Intron                  | LEPROT       | LOC100128633 | C/T | 6.334  | 2.39E-10 | ++ |
| rs10158579 | LEPR | Intron                  | LEPROT       | LOC100128633 | T/C | 6.309  | 2.81E-10 | ++ |
| rs11808888 | LEPR | Intron                  | LEPROT       | LOC100128633 | G/A | 6.306  | 2.86E-10 | ++ |
| rs10128072 | LEPR | Intron                  | LEPROT       | LOC100128633 | A/C | 6.276  | 3.48E-10 | ++ |
| rs1475397  | LEPR | Intron                  | LEPROT       | LOC100128633 | C/T | 6.264  | 3.76E-10 | ++ |
| rs17127677 | LEPR | Intron                  | LEPROT       | LOC100128633 | G/T | 6.258  | 3.90E-10 | ++ |
| rs17127673 | LEPR | Intron                  | LEPROT       | LOC100128633 | A/G | 6.256  | 3.94E-10 | ++ |
| rs11800275 | LEPR | Intron                  | LEPROT       | LOC100128633 | T/A | 6.243  | 4.31E-10 | ++ |
| rs6694528  | LEPR | Intron                  | LEPROT       | LOC100128633 | C/T | 6.243  | 4.31E-10 | ++ |
| rs17127690 | LEPR | Intron                  | LEPROT       | LOC100128633 | A/G | 6.242  | 4.33E-10 | ++ |
| rs9436302  | LEPR | Intron                  | DNAJC6       | LOC100128633 | G/A | 6.239  | 4.40E-10 | ++ |
| rs7602     | LEPR | Intron                  | DNAJC6       | LOC100128633 | G/A | 6.189  | 6.04E-10 | ++ |
| rs6690625  | LEPR | Intron                  | LOC100128633 | PDE4B        | T/G | -6.118 | 9.49E-10 | ++ |
| rs12040007 | LEPR | Intron                  | LOC100128633 | PDE4B        | G/A | -6.098 | 1.08E-09 | -- |
| rs9436303  | LEPR | Intron                  | DNAJC6       | LOC100128633 | A/G | 6.082  | 1.19E-09 | ++ |
| rs4655556  | LEPR | Intron                  | LOC100128633 | PDE4B        | G/A | -6.078 | 1.22E-09 | -- |
| rs1938484  | LEPR | Intron                  | LOC100128633 | PDE4B        | C/A | -6.073 | 1.26E-09 | -- |
| rs12567606 | NA   | NA                      | LEPR         | PDE4B        | A/G | -6.068 | 1.30E-09 | -- |
| rs6667616  | NA   | NA                      | LEPR         | PDE4B        | C/A | -5.930 | 3.03E-09 | -- |
| rs6667615  | NA   | NA                      | LEPR         | PDE4B        | G/A | -5.928 | 3.07E-09 | -- |

|            |             |        |                     |                     |     |        |          |    |
|------------|-------------|--------|---------------------|---------------------|-----|--------|----------|----|
| rs6588156  | NA          | NA     | <i>LEPR</i>         | <i>PDE4B</i>        | G/A | -5.924 | 3.13E-09 | -- |
| rs4655583  | NA          | NA     | <i>LEPR</i>         | <i>PDE4B</i>        | C/A | -5.911 | 3.40E-09 | -- |
| rs6664534  | NA          | NA     | <i>LEPR</i>         | <i>PDE4B</i>        | A/T | -5.893 | 3.80E-09 | -- |
| rs4394621  | NA          | NA     | <i>LEPR</i>         | <i>PDE4B</i>        | A/G | -5.891 | 3.84E-09 | -- |
| rs4655795  | NA          | NA     | <i>LEPR</i>         | <i>PDE4B</i>        | G/T | -5.883 | 4.02E-09 | -- |
| rs1171279  | <i>LEPR</i> | Intron | <i>LEPROT</i>       | <i>LOC100128633</i> | C/T | 5.881  | 4.09E-09 | ++ |
| rs12130476 | NA          | NA     | <i>LEPR</i>         | <i>PDE4B</i>        | G/C | -5.862 | 4.57E-09 | -- |
| rs4655792  | NA          | NA     | <i>LEPR</i>         | <i>PDE4B</i>        | T/G | -5.857 | 4.70E-09 | -- |
| rs2186245  | NA          | NA     | <i>LEPR</i>         | <i>PDE4B</i>        | C/T | -5.856 | 4.74E-09 | -- |
| rs4655555  | <i>LEPR</i> | Intron | <i>LOC100128633</i> | <i>PDE4B</i>        | T/A | -5.855 | 4.76E-09 | -- |
| rs7518632  | NA          | NA     | <i>LEPR</i>         | <i>PDE4B</i>        | C/A | -5.846 | 5.03E-09 | -- |
| rs4655793  | NA          | NA     | <i>LEPR</i>         | <i>PDE4B</i>        | C/A | -5.845 | 5.07E-09 | -- |
| rs4425959  | NA          | NA     | <i>LEPR</i>         | <i>PDE4B</i>        | A/G | -5.820 | 5.88E-09 | -- |
| rs12043772 | NA          | NA     | <i>LEPR</i>         | <i>PDE4B</i>        | C/T | -5.816 | 6.03E-09 | -- |
| rs12145237 | NA          | NA     | <i>LEPR</i>         | <i>PDE4B</i>        | T/A | -5.816 | 6.03E-09 | -- |
| rs1892535  | <i>LEPR</i> | Intron | <i>LOC100128633</i> | <i>PDE4B</i>        | G/A | -5.810 | 6.24E-09 | -- |
| rs9436300  | <i>LEPR</i> | Intron | <i>DNAJC6</i>       | <i>LOC100128633</i> | G/A | -5.797 | 6.74E-09 | -- |
| rs12025906 | <i>LEPR</i> | Intron | <i>LOC100128633</i> | <i>PDE4B</i>        | T/C | -5.793 | 6.90E-09 | -- |
| rs11208720 | NA          | NA     | <i>LEPR</i>         | <i>PDE4B</i>        | A/G | -5.789 | 7.08E-09 | -- |
| rs7534511  | <i>LEPR</i> | Intron | <i>DNAJC6</i>       | <i>LOC100128633</i> | G/A | -5.785 | 7.23E-09 | -- |
| rs11208707 | NA          | NA     | <i>LEPR</i>         | <i>PDE4B</i>        | C/T | -5.785 | 7.24E-09 | -- |
| rs10889576 | NA          | NA     | <i>LEPR</i>         | <i>PDE4B</i>        | C/T | -5.785 | 7.26E-09 | -- |
| rs10736403 | NA          | NA     | <i>LEPR</i>         | <i>PDE4B</i>        | A/G | -5.784 | 7.30E-09 | -- |
| rs11208710 | NA          | NA     | <i>LEPR</i>         | <i>PDE4B</i>        | A/G | -5.783 | 7.32E-09 | -- |
| rs1046011  | <i>LEPR</i> | Intron | <i>LEPROT</i>       | <i>LOC100128633</i> | C/T | -5.783 | 7.34E-09 | -- |
| rs10749756 | NA          | NA     | <i>LEPR</i>         | <i>PDE4B</i>        | C/T | -5.778 | 7.58E-09 | -- |
| rs12117858 | NA          | NA     | <i>LEPR</i>         | <i>PDE4B</i>        | C/T | -5.777 | 7.61E-09 | -- |
| rs12026918 | NA          | NA     | <i>LEPR</i>         | <i>PDE4B</i>        | C/G | -5.777 | 7.62E-09 | -- |
| rs4655779  | NA          | NA     | <i>LEPR</i>         | <i>PDE4B</i>        | A/G | -5.775 | 7.69E-09 | -- |
| rs4655782  | NA          | NA     | <i>LEPR</i>         | <i>PDE4B</i>        | A/G | -5.774 | 7.76E-09 | -- |
| rs4655780  | NA          | NA     | <i>LEPR</i>         | <i>PDE4B</i>        | C/A | -5.772 | 7.84E-09 | -- |
| rs11208709 | NA          | NA     | <i>LEPR</i>         | <i>PDE4B</i>        | G/A | -5.772 | 7.85E-09 | -- |
| rs4655778  | NA          | NA     | <i>LEPR</i>         | <i>PDE4B</i>        | G/A | -5.771 | 7.87E-09 | -- |
| rs12042379 | NA          | NA     | <i>LEPR</i>         | <i>PDE4B</i>        | G/T | -5.764 | 8.21E-09 | -- |
| rs3828033  | <i>LEPR</i> | Intron | <i>LOC100128633</i> | <i>PDE4B</i>        | C/T | -5.690 | 1.27E-08 | -- |
| rs3762274  | <i>LEPR</i> | Intron | <i>LOC100128633</i> | <i>PDE4B</i>        | T/C | -5.689 | 1.28E-08 | -- |
| rs9436301  | <i>LEPR</i> | Intron | <i>DNAJC6</i>       | <i>LOC100128633</i> | T/C | 5.669  | 1.44E-08 | ++ |
| rs10158937 | NA          | NA     | <i>LEPR</i>         | <i>PDE4B</i>        | A/C | -5.668 | 1.45E-08 | -- |

<sup>a</sup>sOB-R levels were log-transformed. <sup>b</sup>Average of  $z$  statistics corresponding to the  $P$  value of association for each single SNP in cases and controls, with weights proportional to the square root of the number of individuals in cases and controls, respectively. The  $z$  statistics were derived from a fixed-effects linear regression model. <sup>c</sup> $P$  value for each SNP was based on the average  $z$  statistics. <sup>d</sup>Direction of association in cases or controls. “++” indicated that each copy of the reference allele was associated with increased sOB-R levels in both cases and controls; “--” indicated that each copy of the reference allele was associated with decreased sOB-R levels in both cases and controls; “+-” or “-+” indicated that the direction of associations was opposite for cases and controls.

**Supplementary Table 5.** Associations between selected SNPs and diabetes risk factors, as well as type 2 diabetes risk in the Nurses' Health Study

|                              | N    | SNPs                   |          |                        |          |                        |          |                        |          |                        |          |
|------------------------------|------|------------------------|----------|------------------------|----------|------------------------|----------|------------------------|----------|------------------------|----------|
|                              |      | rs1137100 <sup>a</sup> |          | rs1137101 <sup>b</sup> |          | rs2767485 <sup>b</sup> |          | rs1751492 <sup>a</sup> |          | rs4655555 <sup>b</sup> |          |
|                              |      | Beta±s.e.              | <i>P</i> |
| BMI (kg/m <sup>2</sup> )     | 3279 | 0.04±0.15              | 0.80     | 0.04±0.13              | 0.77     | -0.22±0.17             | 0.20     | -0.04±0.14             | 0.78     | -0.18±0.16             | 0.28     |
| WHR                          | 2236 | -0.01±0.004            | 0.17     | -0.002±0.003           | 0.46     | -0.006±0.004           | 0.18     | -0.005±0.004           | 0.17     | 0.003±0.004            | 0.54     |
| Leptin (ng/mL)               | 1508 | -0.01±0.02             | 0.64     | -0.006±0.02            | 0.74     | 0.03±0.02              | 0.21     | 0.01±0.02              | 0.59     | -0.003±0.02            | 0.89     |
| HMW adiponectin (µg/mL)      | 1506 | -0.02±0.03             | 0.42     | -0.02±0.03             | 0.33     | 0.02±0.03              | 0.49     | -0.01±0.03             | 0.83     | 0.02±0.03              | 0.45     |
| CRP (mg/dL)                  | 830  | -0.07±0.06             | 0.18     | -0.05±0.05             | 0.34     | -0.03±0.06             | 0.61     | -0.10±0.05             | 0.07     | 0.17±0.06              | 0.005    |
| TNF-αR2 (pg/mL)              | 843  | -0.03±0.021            | 0.15     | 0.001±0.02             | 0.96     | -0.06±0.02             | 0.02     | -0.0±0.02              | 0.08     | 0.05±0.02              | 0.02     |
| IL-6 (ng/mL)                 | 815  | -0.09±0.04             | 0.02     | -0.07±0.03             | 0.04     | -0.07±0.04             | 0.10     | -0.07±0.04             | 0.05     | 0.08±0.04              | 0.06     |
| IL-18 (pg/mL)                | 1505 | -0.02±0.02             | 0.23     | -0.01±0.02             | 0.50     | 0.02±0.02              | 0.39     | 0.001±0.02             | 0.97     | 0.04±0.02              | 0.02     |
| Insulin (µU/mL)              | 604  | 0.04±0.05              | 0.45     | 0.05±0.04              | 0.25     | -0.14±0.05             | 0.008    | -0.01±0.04             | 0.75     | -0.08±0.05             | 0.12     |
| Type 2 diabetes <sup>c</sup> | 3279 | 0.07±0.06              | 0.23     | 0.007±0.05             | 0.90     | 0.02±0.07              | 0.76     | 0.08±0.06              | 0.18     | -0.07±0.07             | 0.30     |

<sup>a</sup>Genotyped SNPs. <sup>b</sup>Imputed SNPs. <sup>c</sup>Both incident and prevalent cases were included. To convert beta ± s.e. to odds ratio (95% CI), exponentiate beta ± 1.96×s.e.

**Supplementary Table 6.** Genotyped SNPs that only reached nominal significance level ( $P < 1 \times 10^{-5}$ ) for plasma sOB-R levels in the Nurses' Health Study<sup>a</sup>

| SNP                     | Chr | Position (bp) <sup>b</sup> | Gene          | Alleles (+/-) | MAF <sup>c</sup> | Geometric LS mean (95% CI), ng/mL <sup>d</sup> |                         |                         | Beta <sup>d</sup> | s.e. | P value <sup>d</sup> |
|-------------------------|-----|----------------------------|---------------|---------------|------------------|------------------------------------------------|-------------------------|-------------------------|-------------------|------|----------------------|
|                         |     |                            |               |               |                  | 0                                              | 1                       | 2                       |                   |      |                      |
| rs12025906              | 5   | 65873972                   | <i>LEPR</i>   | T/C           | 0.19             | 30.7<br>(30.2<br>-31.2)                        | 28.7<br>(28.0<br>-29.3) | 27.0<br>(25.0<br>-29.0) | -0.066            | 0.12 | 1.15E-7              |
| rs4655754               | 5   | 65887335                   | NA            | T/C           | 0.19             | 30.6<br>(30.1<br>-31.2)                        | 28.7<br>(28.1<br>-29.4) | 27.0<br>(25.0<br>-29.0) | -0.065            | 0.12 | 1.48E-7              |
| rs10158937              | 5   | 65917464                   | NA            | C/A           | 0.20             | 30.6<br>(30.1<br>-31.2)                        | 28.9<br>(28.2<br>-29.5) | 26.9<br>(25.1<br>-28.7) | -0.062            | 0.12 | 2.91E-7              |
| rs1567214               | 5   | 69299270                   | NA            | G/C           | 0.40             | 31.0<br>(30.3<br>-31.7)                        | 29.7<br>(29.1<br>-30.2) | 28.2<br>(27.3<br>-29.1) | -0.047            | 0.10 | 1.55E-6              |
| rs6669354 <sup>e</sup>  | 5   | 65697937                   | <i>LEPR</i>   | T/G           | 0.13             | 29.0<br>(23.6<br>-35.6)                        | 31.0<br>(26.4<br>-37.9) | 34.2<br>(27.8<br>-42.4) | 0.069             | 0.14 | 1.97E-6              |
| rs10997637 <sup>e</sup> | 5   | 68863607                   | <i>CTNNA3</i> | T/C           | 0.14             | 29.3<br>(24.0<br>-36.1)                        | 32.8<br>(26.9<br>-40.0) | 31.1<br>(28.7<br>-70.0) | 0.116             | 0.25 | 2.92E-6              |
| rs6527988               | 5   | 20300789                   | NA            | N/A           | 0.26             | 29.2<br>(28.7                                  | 30.8<br>(30.1           | 32.0<br>(30.5           | 0.051             | 0.11 | 4.51E-6              |

|       |   |        |             |    |    |  |        |        |        |     |    |      |
|-------|---|--------|-------------|----|----|--|--------|--------|--------|-----|----|------|
|       | 6 |        |             |    |    |  | -29.7) | -31.5) | -33.7) |     |    |      |
| rs100 |   | 287198 | <i>ACCN</i> | G  | 0  |  | 29.6   | 32.7   | 31.1   | 0.  | 0  | 4.5  |
| 7033  | 5 | 87     | <i>I</i>    | /A | .0 |  | (29.2  | (31.3  | (25.3  | 093 | .0 | 2E-6 |
|       | 0 |        |             |    | 6  |  | -30.0) | -34.2) | -38.8) |     | 20 |      |
|       | 3 |        |             |    |    |  |        |        |        |     |    |      |
| rs112 |   | 657381 | <i>LEPR</i> | T  | 0  |  | 30.9   | 29.2   | 28.5   | -   | 0  | 4.7  |
| 08654 | 5 | 54     |             | /C | .3 |  | (30.3  | (28.7  | (27.3  | 0.0 | .0 | 1E-6 |
|       | 0 |        |             |    | 3  |  | -31.5) | -29.8) | -29.8) | 47  | 10 |      |
|       | 3 |        |             |    |    |  |        |        |        |     |    |      |
| rs943 |   | 656841 | <i>LEPR</i> | T  | 0  |  | 31.1   | 29.4   | 28.6   | -   | 0  | 4.7  |
| 6747  | 5 | 95     |             | /C | .3 |  | (30.4  | (28.8  | (27.5  | 0.0 | .0 | 8E-6 |
|       | 0 |        |             |    | 8  |  | -31.8) | -29.9) | -29.7) | 46  | 10 |      |
|       | 4 |        |             |    |    |  |        |        |        |     |    |      |
| rs311 |   | 135280 | <i>ADAM</i> | T  | 0  |  | 31.3   | 29.6   | 28.8   | -   | 0  | 5.2  |
| 8667  | 4 | 884    | <i>TS13</i> | /C | .4 |  | (30.6  | (29.1  | (28.0  | 0.0 | .0 | 6E-6 |
|       | 4 |        |             |    | 7  |  | -32.1) | -30.2) | -29.6) | 44  | 10 |      |
|       | 9 |        |             |    |    |  |        |        |        |     |    |      |
| rs595 |   | 203033 | NA          | N  | 0  |  | 29.2   | 30.8   | 32.1   | 0.  | 0  | 6.5  |
| 0304  | 5 | 16     |             | A  | .2 |  | (28.7  | (30.1  | (30.5  | 050 | .0 | 6E-6 |
|       | 0 |        |             |    | 6  |  | -29.7) | -31.5) | -33.7) |     | 11 |      |
|       | 4 |        |             |    |    |  |        |        |        |     |    |      |
| rs671 |   | 196040 | NA          | T  | 0  |  | 31.0   | 29.7   | 28.3   | -   | 0  | 8.0  |
| 7199  | 5 | 109    |             | /G | .4 |  | (30.3  | (29.2  | (27.4  | 0.0 | .0 | 5E-6 |
|       | 0 |        |             |    | 0  |  | -31.8) | -30.3) | -29.2) | 45  | 10 |      |
|       | 3 |        |             |    |    |  |        |        |        |     |    |      |
| rs202 |   | 657187 | <i>LEPR</i> | T  | 0  |  | 30.9   | 29.2   | 28.6   | -   | 0  | 8.3  |
| 5804  | 5 | 09     |             | /C | .3 |  | (30.3  | (28.7  | (27.4  | 0.0 | .0 | 3E-6 |
|       | 0 |        |             |    | 3  |  | -31.5) | -29.8) | -29.8) | 46  | 10 |      |
|       | 2 |        |             |    |    |  |        |        |        |     |    |      |
| rs171 |   | 196083 | NA          | T  | 0  |  | 30.9   | 29.8   | 28.2   | -   | 0  | 8.9  |
| 77643 | 5 | 765    |             | /C | .3 |  | (30.2  | (29.2  | (27.3  | 0.0 | .0 | 1E-6 |
|       | 0 |        |             |    | 9  |  | -31.6) | -30.3) | -29.1) | 45  | 10 |      |
|       | 5 |        |             |    |    |  |        |        |        |     |    |      |
| rs109 |   | 689446 | <i>CTNN</i> | G  | 0  |  | 29.3   | 32.5   | 70.0   | 0.  | 0  | 9.3  |
|       | 5 |        |             |    | .0 |  |        |        |        |     | .0 |      |



|                    |   |   |    |    |    |   |        |        |        |     |    |      |
|--------------------|---|---|----|----|----|---|--------|--------|--------|-----|----|------|
| 97688 <sup>c</sup> | 0 | 0 | 82 | A3 | /A | 4 | (24.0  | (26.3  | (70.0  | 108 | 24 | 6E-6 |
|                    | 3 |   |    |    |    |   | -36.0) | -39.0) | -70.0) |     |    |      |

---

<sup>a</sup>sOB-R levels were log-transformed. <sup>b</sup>Position based on NCBI build 36.3. <sup>c</sup>Minor allele frequency among study participants. <sup>d</sup>Adjusted for age at blood draw, diabetes case-control status, fasting status, body mass index, menopausal status, and postmenopausal hormone use. <sup>e</sup>Least square means could not be obtained due to rare homozygous minor alleles (1.7% for rs6669354, 0.2% for rs10997637, and 0.1% for rs10997688). Median (interquartile range) was provided instead.

**Supplementary Table 7.** Genotyped and imputed SNPs that only reached nominal significance level ( $P < 1 \times 10^{-5}$ ) for plasma sOB-R levels<sup>a</sup>

| SNP        | Chr. | Position (bp) <sup>b</sup> | Gene          | Gene region | Alleles (+/-) | MAF <sup>c</sup> | r <sup>2</sup> | Beta <sup>d</sup> | s.e.  | P <sup>d</sup> |
|------------|------|----------------------------|---------------|-------------|---------------|------------------|----------------|-------------------|-------|----------------|
| rs11208720 | 1    | 65931643                   | NA            | NA          | A/G           | 0.20             | 0.9603         | -0.067            | 0.012 | 5.0E-08        |
| rs4425959  | 1    | 65940407                   | NA            | NA          | A/G           | 0.21             | 0.8548         | -0.070            | 0.013 | 5.2E-08        |
| rs3828033  | 1    | 65837298                   | <i>LEPR</i>   | Intron      | C/T           | 0.37             | 0.9137         | -0.056            | 0.010 | 5.2E-08        |
| rs12025906 | 1    | 65873972                   | <i>LEPR</i>   | Intron      | T/C           | 0.19             | 1              | -0.067            | 0.012 | 5.3E-08        |
| rs11208707 | 1    | 65912101                   | NA            | NA          | C/T           | 0.20             | 0.9960         | -0.065            | 0.012 | 5.7E-08        |
| rs11208710 | 1    | 65918627                   | NA            | NA          | A/G           | 0.20             | 0.9968         | -0.065            | 0.012 | 5.8E-08        |
| rs10736403 | 1    | 65912984                   | NA            | NA          | A/G           | 0.20             | 0.9961         | -0.065            | 0.012 | 5.8E-08        |
| rs12042379 | 1    | 65931052                   | NA            | NA          | G/T           | 0.20             | 0.9833         | -0.066            | 0.012 | 5.8E-08        |
| rs10749756 | 1    | 65913099                   | NA            | NA          | C/T           | 0.20             | 0.9962         | -0.065            | 0.012 | 6.0E-08        |
| rs12026918 | 1    | 65918834                   | NA            | NA          | C/G           | 0.20             | 0.9969         | -0.065            | 0.012 | 6.0E-08        |
| rs12117858 | 1    | 65914682                   | NA            | NA          | C/T           | 0.20             | 0.9962         | -0.065            | 0.012 | 6.0E-08        |
| rs4655779  | 1    | 65915118                   | NA            | NA          | A/G           | 0.20             | 0.9963         | -0.065            | 0.012 | 6.1E-08        |
| rs4655782  | 1    | 65915560                   | NA            | NA          | A/G           | 0.20             | 0.9965         | -0.065            | 0.012 | 6.1E-08        |
| rs11208709 | 1    | 65918605                   | NA            | NA          | G/A           | 0.20             | 0.9971         | -0.065            | 0.012 | 6.1E-08        |
| rs4655780  | 1    | 65915365                   | NA            | NA          | C/A           | 0.20             | 0.9966         | -0.065            | 0.012 | 6.2E-08        |
| rs4655778  | 1    | 65914924                   | NA            | NA          | G/A           | 0.20             | 0.9961         | -0.065            | 0.012 | 6.2E-08        |
| rs10889576 | 1    | 65941154                   | NA            | NA          | C/T           | 0.21             | 0.8306         | -0.070            | 0.013 | 6.3E-08        |
| rs10158937 | 1    | 65917464                   | NA            | NA          | A/C           | 0.20             | 0.9999         | -0.064            | 0.012 | 1.2E-07        |
| rs4655811  | 1    | 65695745                   | <i>LEPR</i>   | Intron      | G/C           | 0.32             | 0.9870         | -0.053            | 0.010 | 3.4E-07        |
| rs11800909 | 1    | 65734368                   | <i>LEPR</i>   | Intron      | A/G           | 0.08             | 0.9778         | 0.088             | 0.018 | 7.1E-07        |
| rs1567214  | 1    | 69299270                   | NA            | NA          | G/C           | 0.40             | 1              | -0.048            | 0.010 | 1.2E-06        |
| rs12131840 | 1    | 66004359                   | NA            | NA          | C/T           | 0.15             | 0.9466         | -0.070            | 0.015 | 1.3E-06        |
| rs11208700 | 1    | 65906031                   | NA            | NA          | T/A           | 0.46             | 0.9013         | 0.048             | 0.010 | 2.2E-06        |
| rs970468   | 1    | 65679078                   | <i>LEPR</i>   | Intron      | A/C           | 0.37             | 0.9350         | -0.049            | 0.010 | 2.3E-06        |
| rs6657868  | 1    | 65686295                   | <i>LEPR</i>   | Intron      | G/A           | 0.37             | 0.9956         | -0.048            | 0.010 | 2.3E-06        |
| rs4655783  | 1    | 65915632                   | NA            | NA          | C/T           | 0.46             | 0.9012         | 0.048             | 0.010 | 2.4E-06        |
| rs11804091 | 1    | 65676467                   | <i>LEPR</i>   | Intron      | A/G           | 0.15             | 0.9893         | 0.063             | 0.013 | 2.4E-06        |
| rs9436747  | 1    | 65684195                   | <i>LEPR</i>   | Intron      | C/T           | 0.37             | 1              | -0.047            | 0.010 | 2.6E-06        |
| rs12022410 | 1    | 65926521                   | NA            | NA          | G/A           | 0.46             | 0.9017         | 0.047             | 0.010 | 2.6E-06        |
| rs6669354  | 1    | 65697937                   | <i>LEPR</i>   | Intron      | T/G           | 0.13             | 1              | 0.067             | 0.014 | 2.8E-06        |
| rs1007033  | 17   | 28719887                   | <i>ACCN1</i>  | Intron      | C/T           | 0.06             | 0.9994         | 0.095             | 0.020 | 3.0E-06        |
| rs1327121  | 1    | 65729925                   | <i>LEPR</i>   | Intron      | A/G           | 0.33             | 0.9997         | -0.048            | 0.010 | 3.1E-06        |
| rs11208654 | 1    | 65738154                   | <i>LEPR</i>   | Intron      | T/C           | 0.33             | 1              | -0.048            | 0.010 | 3.1E-06        |
| rs2025804  | 1    | 65718709                   | <i>LEPR</i>   | Intron      | A/G           | 0.33             | 1              | -0.048            | 0.010 | 3.1E-06        |
| rs10997637 | 10   | 68863607                   | <i>CTNNA3</i> | Intron      | C/T           | 0.04             | 0.9995         | 0.115             | 0.025 | 3.3E-06        |
| rs3790433  | 1    | 65666930                   | <i>LEPR</i>   | Intron      | C/T           | 0.24             | 0.7239         | 0.060             | 0.013 | 3.4E-06        |
| rs13438451 | 7    | 14581455                   | <i>DGKB</i>   | Intron      | C/T           | 0.09             | 0.7836         | 0.083             | 0.018 | 3.5E-06        |

|            |    |           |               |        |     |      |        |        |       |         |
|------------|----|-----------|---------------|--------|-----|------|--------|--------|-------|---------|
| rs17557153 | 17 | 35890351  | <i>TNS4</i>   | Intron | C/A | 0.48 | 0.9171 | -0.046 | 0.010 | 3.5E-06 |
| rs4655794  | 1  | 65931889  | NA            | NA     | C/T | 0.47 | 0.8791 | 0.047  | 0.010 | 3.6E-06 |
| rs10019936 | 4  | 161650948 | NA            | NA     | T/C | 0.25 | 0.8978 | -0.053 | 0.012 | 4.1E-06 |
| rs7907340  | 10 | 68864243  | <i>CTNNA3</i> | Intron | C/G | 0.04 | 0.9933 | 0.116  | 0.025 | 4.7E-06 |
| rs7524581  | 1  | 65939087  | NA            | NA     | C/T | 0.36 | 0.8656 | -0.049 | 0.011 | 5.1E-06 |
| rs7907588  | 10 | 68864374  | <i>CTNNA3</i> | Intron | C/G | 0.04 | 0.9888 | 0.115  | 0.025 | 5.1E-06 |
| rs7915595  | 10 | 68866036  | <i>CTNNA3</i> | Intron | T/A | 0.04 | 0.9845 | 0.115  | 0.025 | 5.2E-06 |
| rs12753193 | 1  | 65942267  | NA            | NA     | A/G | 0.36 | 0.8366 | -0.050 | 0.011 | 5.5E-06 |
| rs12131089 | 1  | 69301953  | NA            | NA     | C/A | 0.39 | 0.9919 | -0.045 | 0.010 | 6.1E-06 |
| rs7900877  | 10 | 68874863  | <i>CTNNA3</i> | Intron | T/G | 0.04 | 0.9763 | 0.114  | 0.025 | 6.3E-06 |
| rs7900696  | 10 | 68875017  | <i>CTNNA3</i> | Intron | C/A | 0.04 | 0.9757 | 0.114  | 0.025 | 6.4E-06 |
| rs7541434  | 1  | 65941087  | NA            | NA     | C/A | 0.36 | 0.8427 | -0.049 | 0.011 | 6.5E-06 |
| rs1327115  | 1  | 65739427  | <i>LEPR</i>   | Intron | G/T | 0.38 | 0.9732 | -0.046 | 0.010 | 6.8E-06 |
| rs6678033  | 1  | 65850212  | <i>LEPR</i>   | Intron | G/A | 0.36 | 0.9718 | -0.046 | 0.010 | 7.7E-06 |
| rs743516   | 22 | 20851498  | NA            | NA     | G/A | 0.38 | 0.9334 | -0.046 | 0.010 | 8.3E-06 |
| rs4655557  | 1  | 65853375  | <i>LEPR</i>   | Intron | T/C | 0.36 | 0.9720 | -0.046 | 0.010 | 8.7E-06 |
| rs10997688 | 10 | 68944682  | <i>CTNNA3</i> | Intron | G/A | 0.04 | 1      | 0.109  | 0.024 | 9.0E-06 |
| rs1507860  | 1  | 69293184  | NA            | NA     | G/A | 0.39 | 1      | -0.043 | 0.010 | 9.0E-06 |

<sup>a</sup>n = 1,504; sOB-R levels were transformed on a natural logarithm scale. <sup>b</sup>Position based on NCBI build 36.3. <sup>c</sup>Minor allele frequency among study participants. <sup>d</sup>Regression coefficients and *P* values for every one copy of minor allele were estimated from linear regression models adjusted for age at blood draw, diabetes case-control status, fasting status, body mass index, menopausal status, and postmenopausal hormone use.

**Supplementary Figure 1.** Log Quantile-Quantile (QQ) P value plot for genome-wide scan for log-transformed plasma sOB-R levels. (A) Age at blood draw, fasting and diabetes case-control status, body mass index, menopausal status, and postmenopausal hormone use were adjusted for. (B) Top three eigenvectors for European ancestry were further adjusted for.

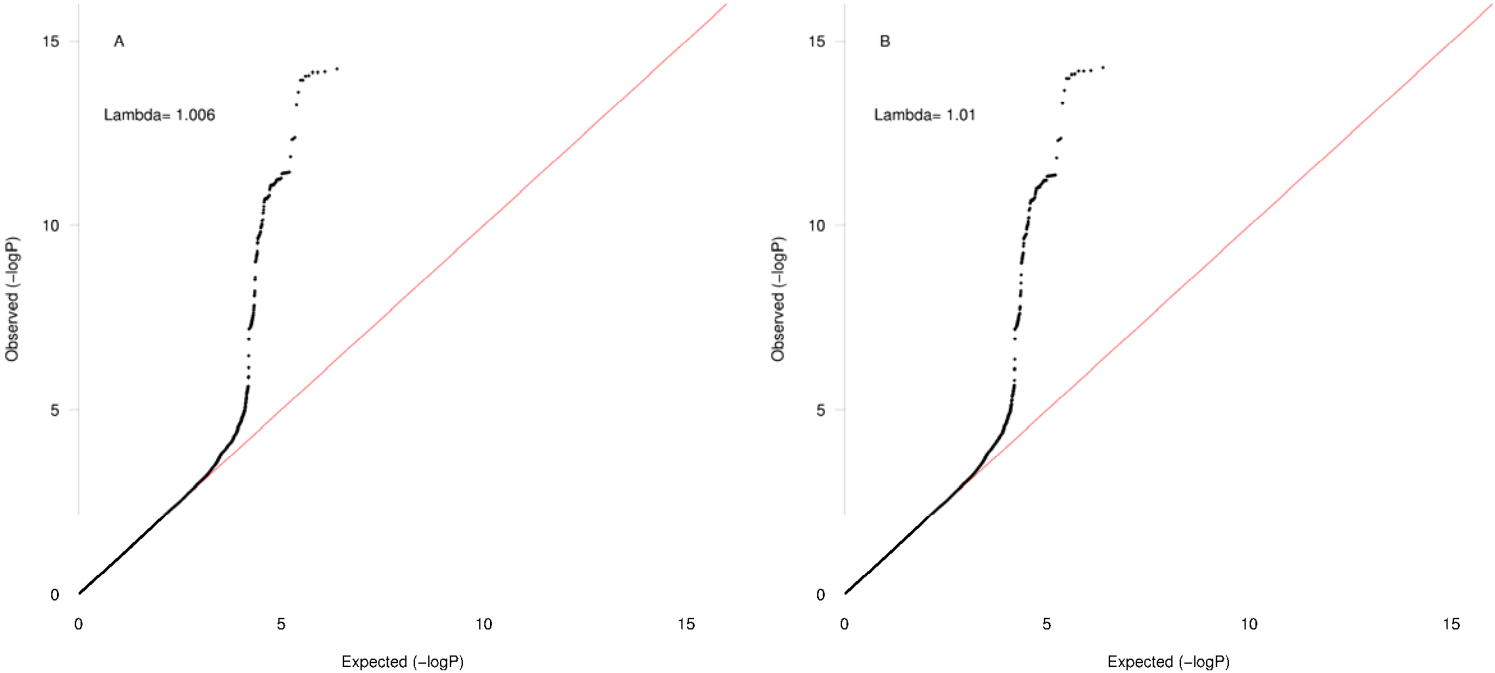

**Supplementary Figure 2.** Log Quantile-Quantile (QQ)  $P$  value plot for genome-wide scan for log-transformed plasma sOB-R levels after excluding SNPs in and adjacent to *LEPR* region on chromosome 1 (65000 kb and 67000 kb on chromosome 1). (A) Age at blood draw, fasting and diabetes case-control status, body mass index, menopausal status, and postmenopausal hormone use were adjusted for. (B) Top three eigenvectors for European ancestry were further adjusted for.

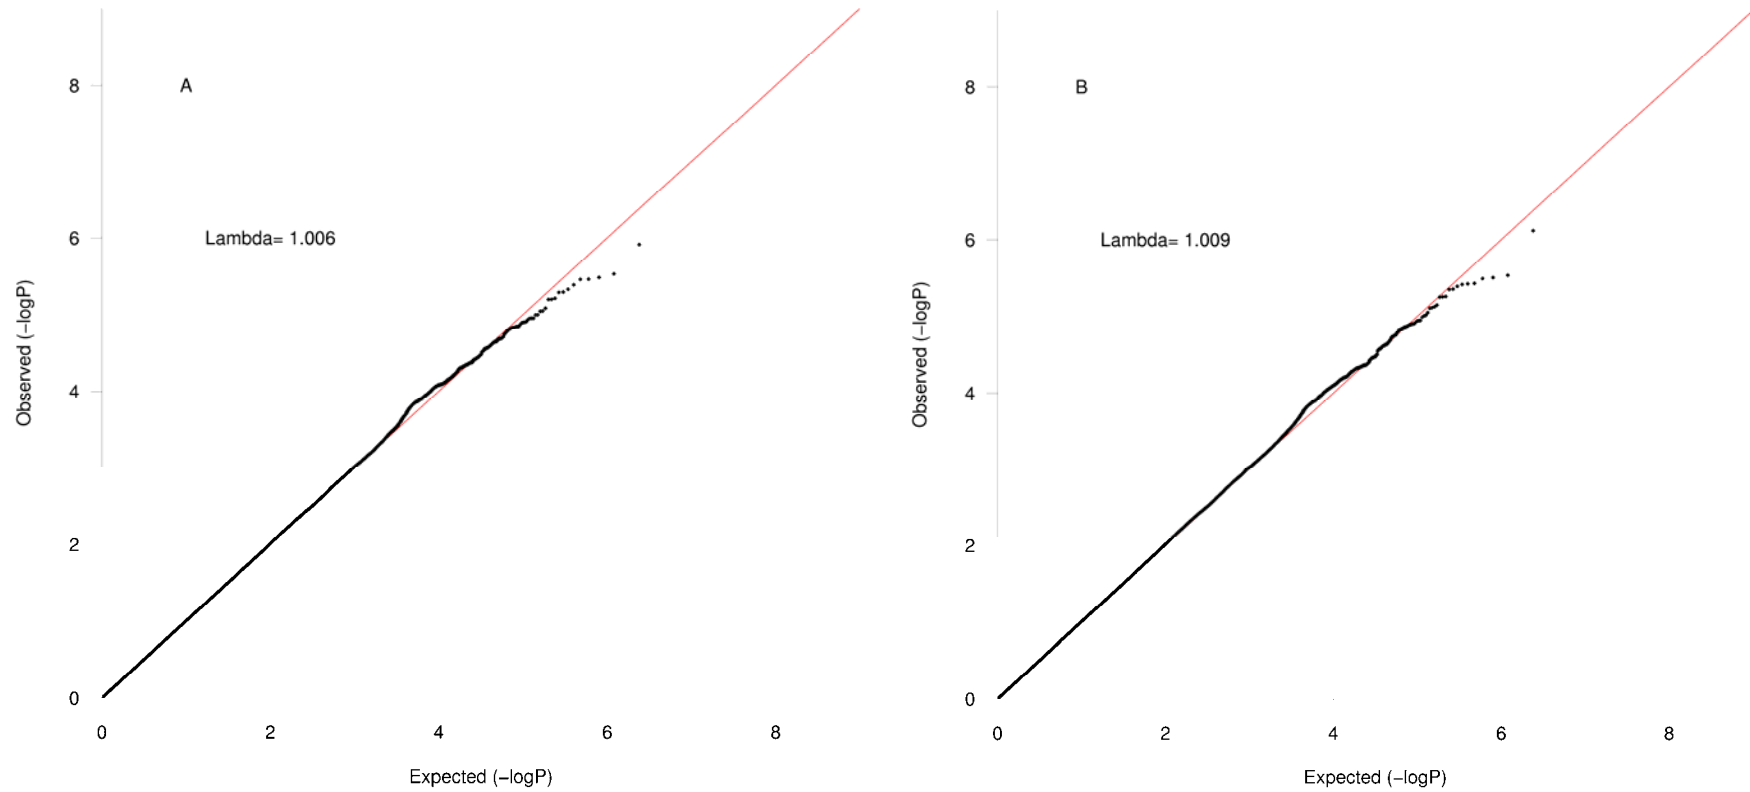

**Supplementary Figure 3.** Eigenvectors 1 and 2 from the principal components analysis of all unduplicated NHS samples (n = 3,369) and all unduplicated and unrelated HapMap controls (n = 209: 59 CEU, 60 YRI, 45 JPT, 45 CHB). Color- and symbol-coding is by self-identified ethnic group.

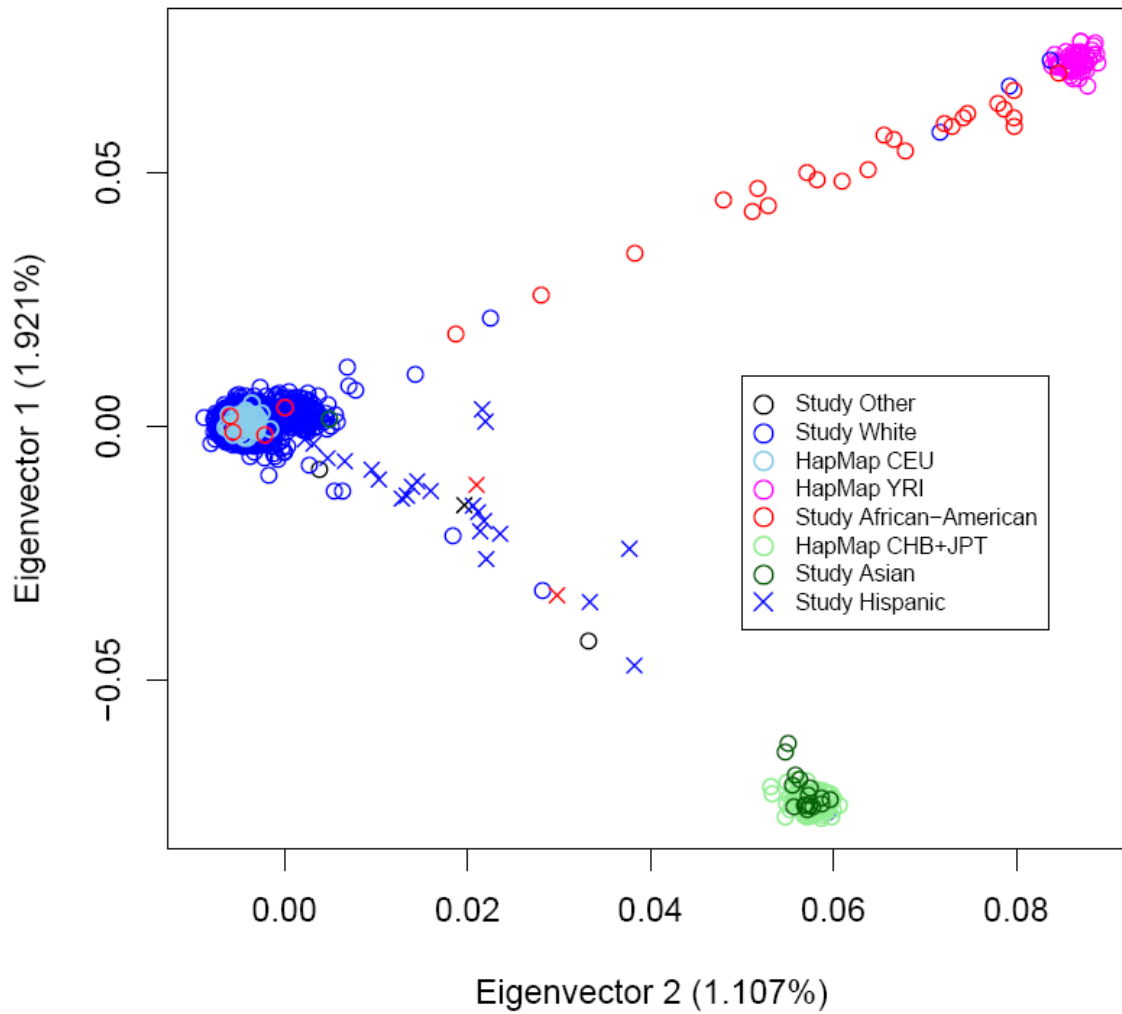

Supplement: ddq056_1.pdf [file ddq056_1.pdf]
